# Supplementary material
Source: PubMed Central journal article supplement (PMC4438216)
Supplement: JB.02557-14_zjb999093635so1.pdf [file JB.02557-14_zjb999093635so1.pdf]

## Supplementary material

**Table S1** Intracellular metabolic profiles obtained by MSFTA-GCMS analysis of cell pellets. Bacterial cultures were sampled at OD<sub>600</sub> 1.5, 2.5, 4.5 and 6.5. A methanol-chloroform extraction was used to isolate metabolites prior to being derivatized with MSTFA and analysed by GCMS. Data is ordered by p-value at OD<sub>600</sub> 4.5. Asterisks indicate significant differences (\* $P \leq 0.05$ , \*\*  $P \leq 0.01$ , two-tailed Student's *t* test). Multiple MSFTA derivatives of the same metabolite are indicated by Arabic numerals in brackets. ND = not detected.

| Metabolite                              | Fold change ( <i>lasI rhII</i> mutant / wild-type) |                         |                         |                         |
|-----------------------------------------|----------------------------------------------------|-------------------------|-------------------------|-------------------------|
|                                         | OD <sub>600</sub> = 1.5                            | OD <sub>600</sub> = 2.5 | OD <sub>600</sub> = 4.5 | OD <sub>600</sub> = 6.5 |
| 1-Glycerophosphoric acid                | 1.3                                                | 2.1                     | 27**                    | 3**                     |
| 2-Hydroxypentanedioic acid              | 1.2                                                | 1.9                     | 5.4**                   | 3.1**                   |
| 3-Pyridinecarboxamide<br>(Nicotinamide) | 1.1                                                | 1.2                     | 2.2**                   | 2.8**                   |
| Pentose-phosphate                       | 1.2                                                | 1.1                     | 16.5**                  | 10.1**                  |
| Phenylalanine (2)                       | 0.8                                                | 0.6                     | 0.5**                   | 2.3                     |
| 3-Hydroxydecanoic acid                  | 0.9                                                | 1.1                     | 0.3**                   | 0.1**                   |
| Trehalose                               | 1.3                                                | 1.1                     | 4.3**                   | ND                      |
| Hypoxanthine (6-<br>Hydroxypurine)      | 1.2                                                | 1.7                     | 2.4**                   | 2.5                     |
| Glutaric acid                           | 1.2                                                | 0.7                     | 0.4**                   | 1.2                     |
| Monosacharide                           | 1.1                                                | 1.1                     | 1.8**                   | 1.9**                   |
| Aromatic                                | 0.9                                                | 1.1                     | 2.8**                   | 4.4*                    |
| Citric acid                             | 0.9                                                | 1.6                     | 2**                     | 2.7**                   |
| Fructose 6-phosphate                    | 1.1                                                | 1.8                     | 2.8**                   | 2.9*                    |
| 5-Aminopentanoic acid                   | 1.1                                                | 1                       | 3.5**                   | 6.5                     |
| Myo-inositol                            | 1                                                  | 1.1                     | 1.6**                   | 1.6**                   |
| Citramalic acid                         | 0.8                                                | 0.8                     | 1.8**                   | 3.8**                   |
| Ribose                                  | 1.2                                                | 1.7                     | 1.9**                   | 2.5**                   |
| Methionine                              | 1.2                                                | 0.7                     | 0.7**                   | 0.5**                   |
| Ribofuranose                            | 1.2                                                | 1.1                     | 0.6**                   | 0.7*                    |
| Malic acid                              | 0.8                                                | 1.1                     | 1.6**                   | 1.3                     |
| Hexose-phosphate                        | 0.8                                                | 1.8                     | 3.1**                   | 2.4*                    |
| Aspartic acid                           | 1.2                                                | 0.8                     | 0.6**                   | 0.8                     |
| Tyrosine (1)                            | 1.3                                                | 0.9                     | 0.6*                    | 0.8                     |
| Adenine                                 | 1.1                                                | 0.8                     | 0.6*                    | 0.7*                    |
| Hexose-phosphate                        | 0.9                                                | 1.8                     | 2.7*                    | 2*                      |
| Glutamic acid                           | 0.7                                                | 0.7                     | 2*                      | 2.5                     |
| Pyrimidine                              | 1.5                                                | 1.2                     | 1.7*                    | 1.9                     |
| Alkane                                  | 1.2                                                | 0.7                     | 0.6*                    | 0.5**                   |
| Putrescine (2)                          | 0.8                                                | 1.2                     | 4.3*                    | 5.9*                    |
| Phenylalanine (1)                       | 1                                                  | 0.9                     | 0.5*                    | 1.9                     |
| Glucose or galactose                    | 1.8                                                | 1.1                     | 0.7*                    | 0.5                     |
| Amino acid                              | 1                                                  | 0.7                     | 1.4*                    | 1.2                     |
| Alkane                                  | 1                                                  | 0.8                     | 0.5*                    | 0.5*                    |

|                                                   |      |     |      |       |
|---------------------------------------------------|------|-----|------|-------|
| Long chain alcohol                                | 1.4  | 0.8 | 0.5* | 0.6** |
| Hexadecanoic acid                                 | 1.2  | 0.7 | 0.5* | 0.5** |
| N-acetylglutamic acid (1)                         | 0.9  | 1.2 | 1.9* | 1.9   |
| Mono-unsaturated fatty acid (1)                   | 1    | 1   | 0.5* | 0.5*  |
| Hexose-phosphate                                  | 1.2  | 3.2 | 2.9* | 4.3** |
| Tyrosine (2)                                      | 1    | 0.7 | 0.5* | 1.9   |
| Alkane                                            | 1    | 0.7 | 0.6  | 0.4*  |
| Alkane                                            | 1.4  | 0.6 | 0.5  | ND    |
| Aromatic                                          | 0.8  | 1   | 0.7  | 0.7   |
| Octadecanol                                       | 1.3  | 0.5 | 0.5  | 0.6   |
| Nonanoic acid                                     | 1.2  | 0.8 | 0.5  | 0.7*  |
| d-altro-2-Heptulose, 7-<br>(dihydrogen phosphate) | 1.2  | 3.8 | 3    | 5.2** |
| Octadecanoic acid                                 | 1.3  | 0.7 | 0.5  | 0.4** |
| Spermidine                                        | 1    | 1.2 | 1.7  | 3.5   |
| Polyamine                                         | 1    | 1.3 | 2.7  | 4.8   |
| 5'-Adenylic acid (AMP)                            | 1.5  | 0.8 | 0.3  | 0.1*  |
| Putrescine (1)                                    | 0.6  | 1.3 | 6    | 5.3   |
| Lysine                                            | 0.9  | 0.6 | 1.6  | 3.3   |
| 1-Monopalmitoylglycerol                           | 1.4  | 1.1 | 0.6  | 0.7*  |
| Cysteine                                          | 0.6  | 0.5 | 0.7  | 0.6   |
| Aromatic                                          | 1.5  | 0.7 | 0.5  | 0.3** |
| Succinate                                         | 1.1  | 1   | 1.2  | 1.4*  |
| Octacosane                                        | 1.3  | 0.7 | 0.5  | 0.5*  |
| Glycerol                                          | 1    | 0.9 | 1.2  | 1.2   |
| Arginine                                          | 1    | 0.8 | 1.4  | 2.3** |
| Alkane                                            | 1    | 0.6 | 0.5  | 0.5** |
| Long chain alcohol                                | 1.3  | 1   | 1.5  | 1.1   |
| Fumaric acid                                      | 1.2  | 1.1 | 1.2  | 1.4** |
| Adenosine                                         | 1    | 0.9 | 0.7  | 0.1   |
| Threonine (2)                                     | 1.1  | 1   | 0.2  | 1.1   |
| N-acetyl glucosamine                              | 1.1  | 1   | 1.2  | 1     |
| Alkane                                            | 1.4  | 0.6 | 0.6  | 0.5   |
| Pyroglutamic acid                                 | 1.1  | 1.1 | 1.2  | 0.9   |
| 5'-Uridylic acid (UMP)                            | 1.9  | 1.4 | 1.8  | 3.2   |
| Glucose or Galactose                              | 1.1  | 1.2 | 0.9  | 1.4*  |
| Pantothenic acid                                  | 0.9  | 1.1 | 1.3  | 1.5*  |
| Valine                                            | 1.1  | 1.1 | 1.2  | 2.3   |
| Threonine (1)                                     | 1.3* | 1   | 0.2  | 0.8   |
| Glucose or Galactose                              | 1.2  | 1.3 | 0.9  | 2**   |
| Glycine                                           | 0.9  | 1.1 | 1.2  | 1     |
| Proline                                           | 1.1  | 0.8 | 1.1  | 0.9   |
| Beta-alanine                                      | 1    | 1.1 | 1.2  | 0.4*  |
| Alkane                                            | 1.3  | 0.6 | 0.7  | ND    |
| Ornithine                                         | 0.8  | 0.5 | 0.6  | 4*    |

|                                                     |     |     |     |      |
|-----------------------------------------------------|-----|-----|-----|------|
| Monosacharide                                       | 0.9 | 0.9 | 0.9 | ND   |
| Tetradecanoic acid                                  | 1   | 0.7 | 0.8 | 1    |
| Glucose or Galactose                                | 2.2 | 1.4 | 0.9 | 1.4* |
| 4-Aminobutyric acid                                 | 1.1 | 1   | 0.9 | 0.5  |
| Ribofuranose                                        | 1.7 | 1.3 | 1.3 | 0.6  |
| Uracil                                              | 1.3 | 1.2 | 1   | 1.1  |
| <i>S</i> -Methyl-5-thioadenosine                    | 1.5 | 1.5 | 0.9 | 2.1  |
| N-acetyl glutamic acid (2)                          | 1.1 | 1.1 | 0.9 | 0.7  |
| Ethanol, 2-amino-                                   | 0.7 | 0.5 | 0.9 | 4.1  |
| 2-Glycerophosphoric acid                            | 1   | 1   | 1   | 1.1  |
| Xanthine                                            | 1   | 1.3 | 0.9 | 6.9  |
| Ethanedithioic acid <i>S</i> -(3-methylbutyl) ester | 1   | 0.8 | 1   | 1.3  |
| 2-Methylbenzoic acid ( <i>o</i> -Toluic acid)       | 0.8 | 0.9 | 1   | 1.8  |

---

**Table S2** Amino acid and polyamine metabolite profiles as determined by LCMS. Student's *t*-tests were calculated relative to the wild-type (WT, for the *lasI rhII* mutant) or relative to the *lasI rhII* mutant (LIRI, for chemical complementation(s)). Complementation values are shown where significant ( $p \leq 0.05$ ). Asterisks indicate significant differences (\* $P \leq 0.05$ , \*\* $P \leq 0.01$ , two-tailed Student's *t* test). "NS" indicates no significant change relative to the non-complemented culture.

| Metabolite                    | OD1.5   |          |      |         |             | OD4.5   |        |     |       |             |
|-------------------------------|---------|----------|------|---------|-------------|---------|--------|-----|-------|-------------|
|                               | WT      | LIRI     | BHL  | OdDHL   | BHL + OdDHL | WT      | LIRI   | BHL | OdDHL | BHL + OdDHL |
| 1-methyl histidine            | 0.5     | 0.1      | NS   | NS      | NS          | 0.2     | 0.3    | NS  | NS    | NS          |
| 3-methyl histidine            | 0.5     | 0.2      | NS   | NS      | NS          | 3.2     | 1.1    | NS  | NS    | NS          |
| 4-aminobutyric acid           | 555.2   | 1291.4** | NS   | 973.5** | NS          | 622.1   | 847.1  | NS  | NS    | NS          |
| 4-hydroxyproline              | 78.7    | 72.9     | NS   | NS      | NS          | 87.1    | 35     | NS  | NS    | NS          |
| $\alpha$ -aminoadipic acid    | 7.4     | 3.8      | NS   | NS      | NS          | 1.6     | 2.2    | NS  | NS    | NS          |
| $\alpha$ -aminobutyric acid   | 123.4   | 115.2    | NS   | NS      | NS          | 88.2    | 128.4  | NS  | NS    | NS          |
| agmatine                      | 69.9    | 48.3     | NS   | NS      | NS          | 56.6    | 49.4   | NS  | NS    | NS          |
| agmatine                      | 65.3    | 48.5     | NS   | NS      | NS          | 76      | 51.1   | NS  | NS    | NS          |
| aminopimelic acid             | 1       | 0.5      | NS   | NS      | NS          | 0.3     | 0.4    | NS  | NS    | NS          |
| arginine                      | 54      | 46.2     | NS   | NS      | NS          | 62.2    | 48.8   | NS  | NS    | NS          |
| aspartic acid                 | 721.7   | 703.2    | NS   | NS      | NS          | 468.9   | 373    | NS  | NS    | 589.8*      |
| $\beta$ -aminoisobutyric acid | 1.9     | 2.1      | NS   | NS      | NS          | 1.5     | 2.2    | NS  | NS    | NS          |
| cadaverine                    | 277     | 135.7*   | NS   | NS      | NS          | 0.7     | 0.4    | NS  | NS    | NS          |
| citrulline                    | 830.1   | 610.8    | NS   | NS      | NS          | 317.3   | 395.2  | NS  | NS    | NS          |
| cystathionine                 | 18.6    | 17.8     | 7.6* | 6.1**   | NS          | 5.4     | 9.4    | NS  | NS    | NS          |
| cysteine                      | 4.7     | 5.3*     | 4**  | NS      | NS          | 4.3     | 5.8    | NS  | NS    | NS          |
| glutamic acid                 | 21195.4 | 15715    | NS   | NS      | NS          | 11381.7 | 8000.2 | NS  | NS    | NS          |
| glutamine                     | 137.7   | 111.1    | NS   | NS      | NS          | 110.4   | 85.1   | NS  | NS    | NS          |
| glycine                       | 8498.8  | 6788.8   | NS   | NS      | NS          | 3195.3  | 3770.8 | NS  | NS    | NS          |

|                 |        |        |         |        |          |        |          |         |          |         |
|-----------------|--------|--------|---------|--------|----------|--------|----------|---------|----------|---------|
| glycine-proline | 9.9    | 5.3    | 8.6*    | NS     | 13.9**   | 9.2    | 6        | NS      | NS       | NS      |
| histidine       | 310.6  | 141.4  | 327.6*  | 349*   | NS       | 120.2  | 220.8    | NS      | NS       | NS      |
| hydroxylysine   | 44.7   | 31.1   | NS      | NS     | NS       | 55.7   | 38.7     | NS      | NS       | NS      |
| isoleucine      | 994.7  | 914.5  | NS      | NS     | NS       | 199    | 218.3    | NS      | NS       | NS      |
| leucine         | 1713.8 | 1313.6 | NS      | NS     | NS       | 624.5  | 945.1    | NS      | NS       | NS      |
| lysine          | 2207.3 | 2478.6 | NS      | NS     | NS       | 255.2  | 524.3**  | 345.9** | NS       | 393.7*  |
| methionine      | 52.5   | 54.9   | NS      | NS     | NS       | 7.6    | 5.4      | NS      | 18.2*    | NS      |
| ornithine       | 109    | 84.4   | 103.2*  | 127.8* | 141.9**  | 58     | 90.5**   | NS      | NS       | 124.1*  |
| phenylalanine   | 1005.7 | 599.7* | NS      | NS     | 1065.1** | 238.4  | 351.2*   | NS      | 261.2**  | 269.6** |
| proline         | 608.8  | 608.1  | NS      | NS     | NS       | 331.2  | 273.6    | NS      | NS       | NS      |
| putrescine      | 1876.4 | 1877.4 | NS      | NS     | NS       | 446.4  | 2217.9** | 731.3** | 1041.7** | 919.6** |
| sarcosine       | 8.4    | 12     | NS      | NS     | NS       | 124.1  | 85.1     | NS      | NS       | NS      |
| serine          | 3092   | 3530.8 | 2063.5* | NS     | NS       | 1524   | 1894.8   | NS      | NS       | NS      |
| spermidine      | 286    | 254    | NS      | NS     | NS       | 52.5   | 225.5**  | 93.8**  | 141.6*   | 90.3**  |
| spermine        | 0      | 0      | NS      | NS     | NS       | 0      | 0.1      | NS      | NS       | NS      |
| thiaproline     | 91.5   | 231.4  | NS      | NS     | NS       | 152.5  | 156.5    | NS      | NS       | NS      |
| threonine       | 499.2  | 663.9  | NS      | 508.2* | NS       | 273    | 285.6    | NS      | NS       | NS      |
| tryptophan      | 11.4   | 7.1    | NS      | NS     | 10**     | 6.9    | 6.7      | NS      | NS       | 11.8*   |
| tyrosine        | 264.2  | 124.1* | 148.9*  | NS     | 288.6**  | 134.2  | 49.2*    | 107.6** | 68.8*    | 167.1** |
| valine          | 3760.4 | 2798   | NS      | NS     | NS       | 1331.7 | 1879.9   | NS      | NS       | NS      |
